# Supplementary material for: Quercus ilex Phyllosphere Microbiome Environmental-Driven Structure and Composition Shifts in a Mediterranean Contex
Source: MDPI journal article supplement (doi:10.3390/plants11243528), 2022-12-15
Supplement: s1 [file s1]

## Supporting Information

### ***Quercus ilex* phyllosphere microbiome environmental-driven structure and composition shifts in a Mediterranean context**

Alessia Postiglione<sup>1a</sup>, Antonello Prigioniero<sup>1a</sup>, Daniela Zuzolo<sup>1\*</sup>, Maria Tartaglia<sup>1</sup>, Pierpaolo Scarano<sup>1</sup>, Maria Maisto<sup>1</sup>, Maria Antonietta Ranauda<sup>1</sup>, Rosaria Sciarrillo<sup>1</sup>, Sofie Thijs<sup>2</sup>, Jaco Vangronsveld<sup>2,3</sup>, Carmine Guarino<sup>1</sup>

<sup>1</sup> Department of Science and Technology, University of Sannio, via de Sanctis snc, Benevento 82100, Italy

<sup>2</sup> Environmental Biology, Centre for Environmental Sciences, Hasselt University, Agoralaan, building D, 3590 Diepenbeek, Belgium

<sup>3</sup> Department of Plant Physiology and Biophysics, Institute of Biological Sciences, Maria Curie-Skłodowska University, Akademicka 19, 20-033 Lublin, Poland;

<sup>a</sup> equal contribution

\* author for correspondence [dzuzolo@unisannio.it](mailto:dzuzolo@unisannio.it)

**Fig. S1** Modularity classes of phyllosphere microbiome of *Q. ilex*; x-axis shows the number of modularity class, y-axis show the number of OTUs falling into each modularity class

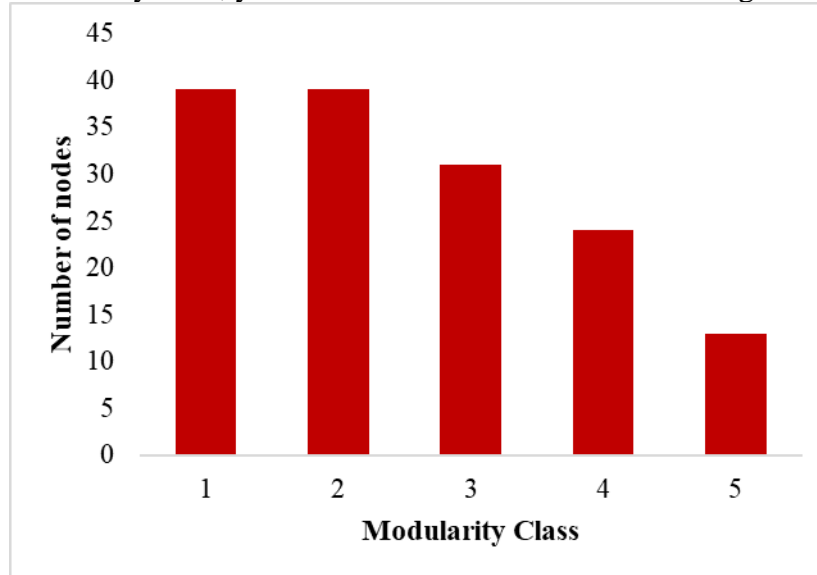

**Table S1** Correlations and topological properties of microbiome networks from phyllosphere of *Q. ilex*.

| Network properties                      |       |
|-----------------------------------------|-------|
| Number of nodes <sup>a</sup>            | 146   |
| Number of edges <sup>b</sup>            | 3,164 |
| Modularity <sup>c</sup>                 | 0.44  |
| Number of communities <sup>d</sup>      | 4     |
| Network diameter <sup>e</sup>           | 5     |
| Average path length <sup>f</sup>        | 2.34  |
| Average degree <sup>g</sup>             | 21.62 |
| Av. clustering coefficient <sup>h</sup> | 0.614 |
| Positive edges <sup>i</sup>             | 2,532 |
| Negative edges <sup>l</sup>             | 632   |

<sup>a</sup>Microbial taxon (at ASV level) with at least one significant ( $P < 0.05$ ) and strong (Spearman's correlation coefficient  $> 0.8$  or  $< -0.8$ ) correlation;

<sup>b</sup>Number of connections/correlations obtained by Spearman analysis;

<sup>c</sup>The capability of the nodes to form highly connected communities, that is, a structure with high density of between nodes connections (inferred by Gephi);

<sup>d</sup>A community is defined as a group of nodes densely connected internally (Gephi);

<sup>e</sup>The longest distance between nodes in the network, measured in number of edges (Gephi);

<sup>f</sup>Average network distance between all pair of nodes or the average length off all edges in the network (Gephi);

<sup>g</sup>The average number of connections per node in the network, that is, the node connectivity (Gephi);

<sup>h</sup>How nodes are embedded in their neighborhood and the degree to which they tend to cluster together (Gephi).

<sup>i</sup>Spearman positive correlation ( $> 0.5$  with  $P < 0.05$ );

<sup>l</sup>Spearman negative correlation ( $< -0.5$  with  $P < 0.05$ ).



**Table S2** Functional metagenomic data (Kegg pathway code: ec00624); number of reads per samples are shown [Table S2 is an excel file submitted separately]
