# Supplementary material for: Quercus ilex Phyllosphere Microbiome Environmental-Driven Structure and Composition Shifts in a Mediterranean Contex
Source: Plants (Basel). 2022 Dec 15;11(24):3528. doi: 10.3390/plants11243528 (PMC9782775; doi:10.3390/plants11243528)
Supplement: Supplementary file 1 [file plants-11-03528-s001.zip › Table S2.xlsx]

## Sheet: functional_profiling_hydrocarbo
Uniprot ID	Uniprot reference Organism	Class	Order	Family	Description	GO IDs	GO names	Enzyme IDs	Enzyme names	Pathway names	UA W 1	UA W 2	UA W 3	NA W 1	NA W 2	UA S 1	UA S 2	UA S 3	NA S 1	NA S 2
A0A645DRE1	bioreactor metagenome	/	/	/	3-hydroxybenzoate 4-monooxygenase {ECO:0000313|EMBL:MPM91042.1}	GO:0018668	M:3-hydroxybenzoate 4-monooxygenase activity	1.14.13.23	3-hydroxybenzoate 4-monooxygenase	Benzoate degradation (path:ec00362); Polycyclic aromatic hydrocarbon degradation (path:ec00624); Microbial metabolism in diverse environments (path:ec01120)	0	0	0	0	1	0	0	0	0	0
A0A2H4I9R9	uncultured bacterium	/	/	/	Protocatechuate 3,4-dioxygenase beta chain {ECO:0000313|EMBL:ART90238.1}	GO:0008199|GO:0018578|GO:0019439	M:ferric iron binding|M:protocatechuate 3,4-dioxygenase activity|B:aromatic compound catabolic process	1.13.11.3	Protocatechuate 3,4-dioxygenase	Benzoate degradation (path:ec00362); Polycyclic aromatic hydrocarbon degradation (path:ec00624); Microbial metabolism in diverse environments (path:ec01120)	0	0	0	0	4	0	0	0	0	0
A0A1J5P2S5	mine drainage metagenome	/	/	/	Protocatechuate 3,4-dioxygenase beta chain {ECO:0000313|EMBL:OIQ65362.1}	GO:0008199|GO:0018578|GO:0006725	M:ferric iron binding|M:protocatechuate 3,4-dioxygenase activity|B:cellular aromatic compound metabolic process	1.13.11.3	Protocatechuate 3,4-dioxygenase	Benzoate degradation (path:ec00362); Polycyclic aromatic hydrocarbon degradation (path:ec00624); Microbial metabolism in diverse environments (path:ec01120)	0	0	0	0	0	0	0	0	1	0
A0A3S0GWS8	Hyphomicrobiales bacterium	Alphaproteobacteria	Hyphomicrobiales	/	Protocatechuate 3,4-dioxygenase subunit alpha {ECO:0000313|EMBL:RTL72691.1}	GO:0008199|GO:0018578|GO:0019439	M:ferric iron binding|M:protocatechuate 3,4-dioxygenase activity|B:aromatic compound catabolic process	1.13.11.3	Protocatechuate 3,4-dioxygenase	Benzoate degradation (path:ec00362); Polycyclic aromatic hydrocarbon degradation (path:ec00624); Microbial metabolism in diverse environments (path:ec01120)	0	0	0	0	4	0	0	0	8	0
A0A1J5R820	mine drainage metagenome	/	/	/	Protocatechuate 4,5-dioxygenase beta chain {ECO:0000313|EMBL:OIQ92158.1}	GO:0008198|GO:0018579|GO:0006725	M:ferrous iron binding|M:protocatechuate 4,5-dioxygenase activity|B:cellular aromatic compound metabolic process	1.13.11.8	Protocatechuate 4,5-dioxygenase	Benzoate degradation (path:ec00362); Polycyclic aromatic hydrocarbon degradation (path:ec00624); Aminobenzoate degradation (path:ec00627); Microbial metabolism in diverse environments (path:ec01120)	0	0	0	0	0	0	0	0	10	0
A0A3N5PCZ1	Xanthomonadales bacterium	Gammaproteobacteria	Xanthomonadales	/	Protocatechuate 4,5-dioxygenase subunit alpha {ECO:0000313|EMBL:RPI60439.1}	GO:0018579	M:protocatechuate 4,5-dioxygenase activity	1.13.11.8	Protocatechuate 4,5-dioxygenase	Benzoate degradation (path:ec00362); Polycyclic aromatic hydrocarbon degradation (path:ec00624); Aminobenzoate degradation (path:ec00627); Microbial metabolism in diverse environments (path:ec01120)	0	0	0	0	0	0	0	0	2	0
A0A4Q3CMN8	Sphingomonadales bacterium	Alphaproteobacteria	Sphingomonadales	/	Protocatechuate 4,5-dioxygenase subunit alpha {ECO:0000313|EMBL:RYD93251.1}	GO:0018579	M:protocatechuate 4,5-dioxygenase activity	1.13.11.8	Protocatechuate 4,5-dioxygenase	Benzoate degradation (path:ec00362); Polycyclic aromatic hydrocarbon degradation (path:ec00624); Aminobenzoate degradation (path:ec00627); Microbial metabolism in diverse environments (path:ec01120)	1	0	0	0	0	0	0	0	0	0
A0A4Q5S102	Sphingomonadales bacterium	Alphaproteobacteria	Sphingomonadales	/	Protocatechuate 4,5-dioxygenase subunit alpha {ECO:0000313|EMBL:RYY27929.1}	GO:0018579	M:protocatechuate 4,5-dioxygenase activity	1.13.11.8	Protocatechuate 4,5-dioxygenase	Benzoate degradation (path:ec00362); Polycyclic aromatic hydrocarbon degradation (path:ec00624); Aminobenzoate degradation (path:ec00627); Microbial metabolism in diverse environments (path:ec01120)	0	0	0	8	0	0	0	0	0	0
A0A5C6U6M3	Piscinibacter aquaticus	Betaproteobacteria	Burkholderiales	/	Protocatechuate 4,5-dioxygenase subunit alpha {ECO:0000313|EMBL:TXC67385.1}	GO:0018579	M:protocatechuate 4,5-dioxygenase activity	1.13.11.8	Protocatechuate 4,5-dioxygenase	Benzoate degradation (path:ec00362); Polycyclic aromatic hydrocarbon degradation (path:ec00624); Aminobenzoate degradation (path:ec00627); Microbial metabolism in diverse environments (path:ec01120)	0	0	0	0	0	0	0	1	0	0
A0A4Q4CZP5	Acetobacteraceae bacterium	Alphaproteobacteria	Rhodospirillales	Acetobacteraceae	Protocatechuate 3,4-dioxygenase subunit alpha {ECO:0000313|EMBL:RYJ04110.1}	GO:0008199|GO:0018578|GO:0019439	M:ferric iron binding|M:protocatechuate 3,4-dioxygenase activity|B:aromatic compound catabolic process	1.13.11.3	Protocatechuate 3,4-dioxygenase	Benzoate degradation (path:ec00362); Polycyclic aromatic hydrocarbon degradation (path:ec00624); Microbial metabolism in diverse environments (path:ec01120)	0	0	0	0	2	0	0	0	0	0
A0A502GCX8	Roseomonas nepalensis	Alphaproteobacteria	Rhodospirillales	Acetobacteraceae	Protocatechuate 3,4-dioxygenase subunit alpha {ECO:0000313|EMBL:TPG59601.1}	GO:0008199|GO:0018578|GO:0019439	M:ferric iron binding|M:protocatechuate 3,4-dioxygenase activity|B:aromatic compound catabolic process	1.13.11.3	Protocatechuate 3,4-dioxygenase	Benzoate degradation (path:ec00362); Polycyclic aromatic hydrocarbon degradation (path:ec00624); Microbial metabolism in diverse environments (path:ec01120)	0	5	3	0	3	0	7	0	0	0
A0A502GE62	Roseomonas nepalensis	Alphaproteobacteria	Rhodospirillales	Acetobacteraceae	Protocatechuate 3,4-dioxygenase subunit beta {ECO:0000313|EMBL:TPG59600.1}	GO:0008199|GO:0018578|GO:0019619	M:ferric iron binding|M:protocatechuate 3,4-dioxygenase activity|B:3,4-dihydroxybenzoate catabolic process	1.13.11.3	Protocatechuate 3,4-dioxygenase	Benzoate degradation (path:ec00362); Polycyclic aromatic hydrocarbon degradation (path:ec00624); Microbial metabolism in diverse environments (path:ec01120)	9	0	0	0	4	0	0	0	0	0
A0A6P1R0M9	Bradyrhizobium sp. LCT2	Alphaproteobacteria	Hyphomicrobiales	Bradyrhizobiaceae	Protocatechuate 3,4-dioxygenase subunit beta {ECO:0000313|EMBL:QHP67252.1}	GO:0008199|GO:0018578|GO:0019619	M:ferric iron binding|M:protocatechuate 3,4-dioxygenase activity|B:3,4-dihydroxybenzoate catabolic process	1.13.11.3	Protocatechuate 3,4-dioxygenase	Benzoate degradation (path:ec00362); Polycyclic aromatic hydrocarbon degradation (path:ec00624); Microbial metabolism in diverse environments (path:ec01120)	0	0	0	0	5	0	0	0	0	0
A4YQJ5	Bradyrhizobium sp. (strain ORS 278)	Alphaproteobacteria	Hyphomicrobiales	Bradyrhizobiaceae	Protocatechuate 4,5-dioxygenase, alpha chain {ECO:0000313|EMBL:CAL76171.1}	GO:0018579	M:protocatechuate 4,5-dioxygenase activity	1.13.11.8	Protocatechuate 4,5-dioxygenase	Benzoate degradation (path:ec00362); Polycyclic aromatic hydrocarbon degradation (path:ec00624); Aminobenzoate degradation (path:ec00627); Microbial metabolism in diverse environments (path:ec01120)	0	0	0	0	0	0	0	0	1	0
A0A7W8LAD5	Paraburkholderia youngii	Betaproteobacteria	Burkholderiales	Burkholderiaceae	4,5-dihydroxyphthalate decarboxylase {ECO:0000313|EMBL:MBB5403030.1}	None	None	4.1.1.55	4,5-dihydroxyphthalate decarboxylase	Polycyclic aromatic hydrocarbon degradation (path:ec00624); Microbial metabolism in diverse environments (path:ec01120)	0	0	0	0	0	0	0	0	5	0
A0A1C0XN91	Ralstonia pickettii (Burkholderia pickettii)	Betaproteobacteria	Burkholderiales	Burkholderiaceae	Protocatechuate 3,4-dioxygenase subunit beta {ECO:0000313|EMBL:MRT01070.1}	GO:0008199|GO:0018578|GO:0019619	M:ferric iron binding|M:protocatechuate 3,4-dioxygenase activity|B:3,4-dihydroxybenzoate catabolic process	1.13.11.3	Protocatechuate 3,4-dioxygenase	Benzoate degradation (path:ec00362); Polycyclic aromatic hydrocarbon degradation (path:ec00624); Microbial metabolism in diverse environments (path:ec01120)	0	0	0	0	4	0	0	0	0	0
A0A1N7S8Y5	Paraburkholderia ribeironis	Betaproteobacteria	Burkholderiales	Burkholderiaceae	Protocatechuate 4,5-dioxygenase beta chain {ECO:0000313|EMBL:SIT43850.1}	GO:0008198|GO:0018579|GO:0019489	M:ferrous iron binding|M:protocatechuate 4,5-dioxygenase activity|B:methylgallate metabolic process	1.13.11.8	Protocatechuate 4,5-dioxygenase	Benzoate degradation (path:ec00362); Polycyclic aromatic hydrocarbon degradation (path:ec00624); Aminobenzoate degradation (path:ec00627); Microbial metabolism in diverse environments (path:ec01120)	3	0	0	0	0	0	0	0	0	0
A0A5C1Q9X5	Sphaerotilus natans subsp. sulfidivorans	Betaproteobacteria	Burkholderiales	Burkholderiaceae	Protocatechuate 4,5-dioxygenase subunit alpha {ECO:0000313|EMBL:QEN02972.1}	GO:0018579	M:protocatechuate 4,5-dioxygenase activity	1.13.11.8	Protocatechuate 4,5-dioxygenase	Benzoate degradation (path:ec00362); Polycyclic aromatic hydrocarbon degradation (path:ec00624); Aminobenzoate degradation (path:ec00627); Microbial metabolism in diverse environments (path:ec01120)	0	0	0	0	2	0	0	0	0	0
A0A0P0MG51	Limnohabitans sp. 103DPR2	Betaproteobacteria	Burkholderiales	Comamonadaceae	4,5-dihydroxyphthalate decarboxylase {ECO:0000313|EMBL:ALK92092.1}	GO:0018796	M:4,5-dihydroxyphthalate decarboxylase activity	4.1.1.55	4,5-dihydroxyphthalate decarboxylase	Polycyclic aromatic hydrocarbon degradation (path:ec00624); Microbial metabolism in diverse environments (path:ec01120)	0	0	0	0	9	0	0	0	0	0
A0A0N7JA67	Limnohabitans sp. 103DPR2	Betaproteobacteria	Burkholderiales	Comamonadaceae	4,5-dihydroxyphthalate decarboxylase {ECO:0000313|EMBL:ALK92944.1}	GO:0018796	M:4,5-dihydroxyphthalate decarboxylase activity	4.1.1.55	4,5-dihydroxyphthalate decarboxylase	Polycyclic aromatic hydrocarbon degradation (path:ec00624); Microbial metabolism in diverse environments (path:ec01120)	0	0	0	0	17	0	0	0	0	0
A0A0P0MCF4	Limnohabitans sp. 103DPR2	Betaproteobacteria	Burkholderiales	Comamonadaceae	Phthalate 4,5-dioxygenase oxygenase subunit {ECO:0000313|EMBL:ALK90609.1}	GO:0051537|GO:0046872|GO:0018620	M:2 iron, 2 sulfur cluster binding|M:metal ion binding|M:phthalate 4,5-dioxygenase activity	1.14.12.7	Phthalate 4,5-dioxygenase	Polycyclic aromatic hydrocarbon degradation (path:ec00624); Microbial metabolism in diverse environments (path:ec01120)	0	0	0	0	18	0	0	0	0	0
A0A0P0MI79	Limnohabitans sp. 103DPR2	Betaproteobacteria	Burkholderiales	Comamonadaceae	Phthalate 4,5-dioxygenase oxygenase subunit {ECO:0000313|EMBL:ALK92953.1}	GO:0051537|GO:0046872|GO:0018620	M:2 iron, 2 sulfur cluster binding|M:metal ion binding|M:phthalate 4,5-dioxygenase activity	1.14.12.7	Phthalate 4,5-dioxygenase	Polycyclic aromatic hydrocarbon degradation (path:ec00624); Microbial metabolism in diverse environments (path:ec01120)	0	0	0	0	14	0	0	0	0	0
A0A0P0MIW1	Limnohabitans sp. 103DPR2	Betaproteobacteria	Burkholderiales	Comamonadaceae	Phthalate 4,5-dioxygenase oxygenase subunit {ECO:0000313|EMBL:ALK93099.1}	GO:0051537|GO:0046872|GO:0018620	M:2 iron, 2 sulfur cluster binding|M:metal ion binding|M:phthalate 4,5-dioxygenase activity	1.14.12.7	Phthalate 4,5-dioxygenase	Polycyclic aromatic hydrocarbon degradation (path:ec00624); Microbial metabolism in diverse environments (path:ec01120)	0	0	0	0	38	0	0	0	0	0
A0A520GYP6	Variovorax sp.	Betaproteobacteria	Burkholderiales	Comamonadaceae	Protocatechuate 3,4-dioxygenase subunit alpha {ECO:0000313|EMBL:RZL99352.1}	GO:0008199|GO:0018578|GO:0019439	M:ferric iron binding|M:protocatechuate 3,4-dioxygenase activity|B:aromatic compound catabolic process	1.13.11.3	Protocatechuate 3,4-dioxygenase	Benzoate degradation (path:ec00362); Polycyclic aromatic hydrocarbon degradation (path:ec00624); Microbial metabolism in diverse environments (path:ec01120)	34	20	0	3	6	3	14	0	0	0
A0A520H2K3	Variovorax sp.	Betaproteobacteria	Burkholderiales	Comamonadaceae	Protocatechuate 3,4-dioxygenase subunit alpha {ECO:0000313|EMBL:RZM00737.1}	GO:0008199|GO:0018578|GO:0019439	M:ferric iron binding|M:protocatechuate 3,4-dioxygenase activity|B:aromatic compound catabolic process	1.13.11.3	Protocatechuate 3,4-dioxygenase	Benzoate degradation (path:ec00362); Polycyclic aromatic hydrocarbon degradation (path:ec00624); Microbial metabolism in diverse environments (path:ec01120)	5	5	0	0	0	0	0	0	0	0
A0A520C6G4	Variovorax sp.	Betaproteobacteria	Burkholderiales	Comamonadaceae	Protocatechuate 3,4-dioxygenase subunit beta {ECO:0000313|EMBL:RZL40823.1}	GO:0008199|GO:0018578|GO:0019619	M:ferric iron binding|M:protocatechuate 3,4-dioxygenase activity|B:3,4-dihydroxybenzoate catabolic process	1.13.11.3	Protocatechuate 3,4-dioxygenase	Benzoate degradation (path:ec00362); Polycyclic aromatic hydrocarbon degradation (path:ec00624); Microbial metabolism in diverse environments (path:ec01120)	31	31	0	0	20	0	0	5	9	0
A0A520FYV9	Variovorax sp.	Betaproteobacteria	Burkholderiales	Comamonadaceae	Protocatechuate 3,4-dioxygenase subunit beta {ECO:0000313|EMBL:RZL87138.1}	GO:0008199|GO:0018578|GO:0019619	M:ferric iron binding|M:protocatechuate 3,4-dioxygenase activity|B:3,4-dihydroxybenzoate catabolic process	1.13.11.3	Protocatechuate 3,4-dioxygenase	Benzoate degradation (path:ec00362); Polycyclic aromatic hydrocarbon degradation (path:ec00624); Microbial metabolism in diverse environments (path:ec01120)	0	0	0	0	4	0	0	0	0	0
A0A520H666	Variovorax sp.	Betaproteobacteria	Burkholderiales	Comamonadaceae	Protocatechuate 3,4-dioxygenase subunit beta {ECO:0000313|EMBL:RZM01994.1}	GO:0008199|GO:0018578|GO:0019619	M:ferric iron binding|M:protocatechuate 3,4-dioxygenase activity|B:3,4-dihydroxybenzoate catabolic process	1.13.11.3	Protocatechuate 3,4-dioxygenase	Benzoate degradation (path:ec00362); Polycyclic aromatic hydrocarbon degradation (path:ec00624); Microbial metabolism in diverse environments (path:ec01120)	39	45	0	0	26	5	19	0	8	0
A0A4S3Q7D8	Kocuria rosea (Deinococcus erythromyxa) (Micrococcus rubens)	Betaproteobacteria	Burkholderiales	Comamonadaceae	Protocatechuate 3,4-dioxygenase subunit beta {ECO:0000313|EMBL:THE18471.1}	GO:0008199|GO:0018578|GO:0019619	M:ferric iron binding|M:protocatechuate 3,4-dioxygenase activity|B:3,4-dihydroxybenzoate catabolic process	1.13.11.3	Protocatechuate 3,4-dioxygenase	Benzoate degradation (path:ec00362); Polycyclic aromatic hydrocarbon degradation (path:ec00624); Microbial metabolism in diverse environments (path:ec01120)	0	0	0	0	0	0	0	9	0	0
C9YDT2	Curvibacter putative symbiont of Hydra magnipapillata	Betaproteobacteria	Burkholderiales	Comamonadaceae	Protocatechuate 4,5-dioxygenase alpha chain {ECO:0000313|EMBL:CBA31488.1}	GO:0018579	M:protocatechuate 4,5-dioxygenase activity	1.13.11.8	Protocatechuate 4,5-dioxygenase	Benzoate degradation (path:ec00362); Polycyclic aromatic hydrocarbon degradation (path:ec00624); Aminobenzoate degradation (path:ec00627); Microbial metabolism in diverse environments (path:ec01120)	0	0	0	0	13	0	0	0	0	0
A0A0P0MG15	Limnohabitans sp. 103DPR2	Betaproteobacteria	Burkholderiales	Comamonadaceae	Protocatechuate 4,5-dioxygenase beta chain {ECO:0000313|EMBL:ALK91899.1}	GO:0008198|GO:0018579|GO:0006725	M:ferrous iron binding|M:protocatechuate 4,5-dioxygenase activity|B:cellular aromatic compound metabolic process	1.13.11.8	Protocatechuate 4,5-dioxygenase	Benzoate degradation (path:ec00362); Polycyclic aromatic hydrocarbon degradation (path:ec00624); Aminobenzoate degradation (path:ec00627); Microbial metabolism in diverse environments (path:ec01120)	0	0	0	0	20	0	0	0	0	0
A0A1Y0NDX0	Curvibacter sp. AEP1-3	Betaproteobacteria	Burkholderiales	Comamonadaceae	Protocatechuate 4,5-dioxygenase beta chain {ECO:0000313|EMBL:ARV19960.1}	GO:0008198|GO:0018579|GO:0006725	M:ferrous iron binding|M:protocatechuate 4,5-dioxygenase activity|B:cellular aromatic compound metabolic process	1.13.11.8	Protocatechuate 4,5-dioxygenase	Benzoate degradation (path:ec00362); Polycyclic aromatic hydrocarbon degradation (path:ec00624); Aminobenzoate degradation (path:ec00627); Microbial metabolism in diverse environments (path:ec01120)	0	0	0	0	15	0	0	0	0	0
W7X634	Hydrogenophaga sp. T4	Betaproteobacteria	Burkholderiales	Comamonadaceae	Protocatechuate 4,5-dioxygenase beta chain {ECO:0000313|EMBL:EWS65022.1}	GO:0008198|GO:0018579|GO:0006725	M:ferrous iron binding|M:protocatechuate 4,5-dioxygenase activity|B:cellular aromatic compound metabolic process	1.13.11.8	Protocatechuate 4,5-dioxygenase	Benzoate degradation (path:ec00362); Polycyclic aromatic hydrocarbon degradation (path:ec00624); Aminobenzoate degradation (path:ec00627); Microbial metabolism in diverse environments (path:ec01120)	0	0	0	0	2	0	0	0	0	0
A0A0F7KX30	Altererythrobacter atlanticus	Alphaproteobacteria	Sphingomonadales	Erythrobacteraceae	Protocatechuate 4,5-dioxygenase alpha chain {ECO:0000313|EMBL:AKH44234.1}	GO:0018579	M:protocatechuate 4,5-dioxygenase activity	1.13.11.8	Protocatechuate 4,5-dioxygenase	Benzoate degradation (path:ec00362); Polycyclic aromatic hydrocarbon degradation (path:ec00624); Aminobenzoate degradation (path:ec00627); Microbial metabolism in diverse environments (path:ec01120)	0	6	0	0	0	0	0	0	0	0
A0A1Z1FGW0	Croceicoccus marinus	Alphaproteobacteria	Sphingomonadales	Erythrobacteraceae	Protocatechuate 4,5-dioxygenase subunit alpha {ECO:0000313|EMBL:ARU18044.1}	GO:0051213	M:dioxygenase activity	1.13.11.8	Protocatechuate 4,5-dioxygenase	Benzoate degradation (path:ec00362); Polycyclic aromatic hydrocarbon degradation (path:ec00624); Aminobenzoate degradation (path:ec00627); Microbial metabolism in diverse environments (path:ec01120)	0	0	3	6	0	0	0	0	0	0
A0A6I4UTE6	Altererythrobacter soli	Alphaproteobacteria	Sphingomonadales	Erythrobacteraceae	Protocatechuate 4,5-dioxygenase subunit alpha {ECO:0000313|EMBL:MXP42180.1}	GO:0018579	M:protocatechuate 4,5-dioxygenase activity	1.13.11.8	Protocatechuate 4,5-dioxygenase	Benzoate degradation (path:ec00362); Polycyclic aromatic hydrocarbon degradation (path:ec00624); Aminobenzoate degradation (path:ec00627); Microbial metabolism in diverse environments (path:ec01120)	0	0	0	0	0	0	2	0	0	0
A0A420EIZ1	Altererythrobacter spongiae	Alphaproteobacteria	Sphingomonadales	Erythrobacteraceae	Protocatechuate 4,5-dioxygenase subunit alpha {ECO:0000313|EMBL:RKF20679.1}	GO:0018579	M:protocatechuate 4,5-dioxygenase activity	1.13.11.8	Protocatechuate 4,5-dioxygenase	Benzoate degradation (path:ec00362); Polycyclic aromatic hydrocarbon degradation (path:ec00624); Aminobenzoate degradation (path:ec00627); Microbial metabolism in diverse environments (path:ec01120)	0	0	1	4	12	0	0	0	0	0
A0A4V4U8R7	Alteraurantiacibacter aquimixticola	Alphaproteobacteria	Sphingomonadales	Erythrobacteraceae	Protocatechuate 4,5-dioxygenase subunit alpha {ECO:0000313|EMBL:TIX48797.1}	GO:0018579	M:protocatechuate 4,5-dioxygenase activity	1.13.11.8	Protocatechuate 4,5-dioxygenase	Benzoate degradation (path:ec00362); Polycyclic aromatic hydrocarbon degradation (path:ec00624); Aminobenzoate degradation (path:ec00627); Microbial metabolism in diverse environments (path:ec01120)	0	0	6	6	5	0	0	0	0	0
A0A6N6T2C1	Hyphomicrobiaceae bacterium	Alphaproteobacteria	Hyphomicrobiales	Hyphomicrobiaceae	Protocatechuate 3,4-dioxygenase subunit beta {ECO:0000313|EMBL:KAB2919488.1}	GO:0008199|GO:0018578|GO:0019619	M:ferric iron binding|M:protocatechuate 3,4-dioxygenase activity|B:3,4-dihydroxybenzoate catabolic process	1.13.11.3	Protocatechuate 3,4-dioxygenase	Benzoate degradation (path:ec00362); Polycyclic aromatic hydrocarbon degradation (path:ec00624); Microbial metabolism in diverse environments (path:ec01120)	0	0	0	0	4	0	0	0	0	0
A0A4Q2U9N0	Lichenibacterium minor	Alphaproteobacteria	Hyphomicrobiales	Lichenibacteriaceae	Protocatechuate 3,4-dioxygenase subunit alpha {ECO:0000313|EMBL:RYC33539.1}	GO:0008199|GO:0018578|GO:0019439	M:ferric iron binding|M:protocatechuate 3,4-dioxygenase activity|B:aromatic compound catabolic process	1.13.11.3	Protocatechuate 3,4-dioxygenase	Benzoate degradation (path:ec00362); Polycyclic aromatic hydrocarbon degradation (path:ec00624); Microbial metabolism in diverse environments (path:ec01120)	0	0	14	83	21	0	0	0	13	5
A0A4Q2UBU9	Lichenibacterium minor	Alphaproteobacteria	Hyphomicrobiales	Lichenibacteriaceae	Protocatechuate 3,4-dioxygenase subunit beta {ECO:0000313|EMBL:RYC33538.1}	GO:0008199|GO:0018578|GO:0019619	M:ferric iron binding|M:protocatechuate 3,4-dioxygenase activity|B:3,4-dihydroxybenzoate catabolic process	1.13.11.3	Protocatechuate 3,4-dioxygenase	Benzoate degradation (path:ec00362); Polycyclic aromatic hydrocarbon degradation (path:ec00624); Microbial metabolism in diverse environments (path:ec01120)	0	0	14	131	27	0	0	0	22	5
A0A4S4FN31	Naasia lichenicola	Actinobacteria	Micrococcales	Microbacteriaceae	Protocatechuate 3,4-dioxygenase subunit beta {ECO:0000313|EMBL:THG31668.1}	GO:0008199|GO:0018578|GO:0019619	M:ferric iron binding|M:protocatechuate 3,4-dioxygenase activity|B:3,4-dihydroxybenzoate catabolic process	1.13.11.3	Protocatechuate 3,4-dioxygenase	Benzoate degradation (path:ec00362); Polycyclic aromatic hydrocarbon degradation (path:ec00624); Microbial metabolism in diverse environments (path:ec01120)	5	0	0	0	0	0	0	0	0	0
A0A7D7L1T5	Kocuria varians (Micrococcus varians)	Actinobacteria	Micrococcales	Micrococcaceae	Protocatechuate 3,4-dioxygenase beta chain {ECO:0000313|EMBL:QMS55404.1}	GO:0008199|GO:0018578|GO:0006725	M:ferric iron binding|M:protocatechuate 3,4-dioxygenase activity|B:cellular aromatic compound metabolic process	1.13.11.3	Protocatechuate 3,4-dioxygenase	Benzoate degradation (path:ec00362); Polycyclic aromatic hydrocarbon degradation (path:ec00624); Microbial metabolism in diverse environments (path:ec01120)	0	0	0	0	0	1	0	0	2	1
A0A4R5YQP9	Kocuria rosea (Deinococcus erythromyxa) (Micrococcus rubens)	Actinobacteria	Micrococcales	Micrococcaceae	Protocatechuate 3,4-dioxygenase subunit alpha {ECO:0000313|EMBL:TDL47131.1}	GO:0008199|GO:0018578|GO:0019439	M:ferric iron binding|M:protocatechuate 3,4-dioxygenase activity|B:aromatic compound catabolic process	1.13.11.3	Protocatechuate 3,4-dioxygenase	Benzoate degradation (path:ec00362); Polycyclic aromatic hydrocarbon degradation (path:ec00624); Microbial metabolism in diverse environments (path:ec01120)	0	0	0	0	0	0	5	0	0	0
A0A4S4FML8	Naasia lichenicola	Actinobacteria	Micrococcales	Micrococcaceae	Protocatechuate 3,4-dioxygenase subunit alpha {ECO:0000313|EMBL:THG31669.1}	GO:0008199|GO:0018578|GO:0019439	M:ferric iron binding|M:protocatechuate 3,4-dioxygenase activity|B:aromatic compound catabolic process	1.13.11.3	Protocatechuate 3,4-dioxygenase	Benzoate degradation (path:ec00362); Polycyclic aromatic hydrocarbon degradation (path:ec00624); Microbial metabolism in diverse environments (path:ec01120)	3	0	0	0	0	0	0	0	0	0
A0A024H8B5	Pseudarthrobacter siccitolerans	Actinobacteria	Micrococcales	Micrococcaceae	Protocatechuate 3,4-dioxygenase, alpha subunit {ECO:0000313|EMBL:CCQ48420.1}	GO:0008199|GO:0018578|GO:0019439	M:ferric iron binding|M:protocatechuate 3,4-dioxygenase activity|B:aromatic compound catabolic process	1.13.11.3	Protocatechuate 3,4-dioxygenase	Benzoate degradation (path:ec00362); Polycyclic aromatic hydrocarbon degradation (path:ec00624); Microbial metabolism in diverse environments (path:ec01120)	0	0	0	0	0	2	0	0	0	0
A0A1C4ZP41	Micromonospora carbonacea	Actinobacteria	Micromonosporales	Micromonosporaceae	Extradiol ring-cleavage dioxygenase {ECO:0000313|EMBL:QLD25323.1}	GO:0051213|GO:0008198|GO:0006725	M:dioxygenase activity|M:ferrous iron binding|B:cellular aromatic compound metabolic process	1.13.11.8	Protocatechuate 4,5-dioxygenase	Benzoate degradation (path:ec00362); Polycyclic aromatic hydrocarbon degradation (path:ec00624); Aminobenzoate degradation (path:ec00627); Microbial metabolism in diverse environments (path:ec01120)	7	0	6	0	0	0	0	0	0	0
A0A5P3MFH2	Acinetobacter sp.	Gammaproteobacteria	Pseudomonadales	Moraxellaceae	Protocatechuate 3,4-dioxygenase {ECO:0000313|EMBL:QEY02543.1}	GO:0008199|GO:0018578|GO:0006725	M:ferric iron binding|M:protocatechuate 3,4-dioxygenase activity|B:cellular aromatic compound metabolic process	1.13.11.3	Protocatechuate 3,4-dioxygenase	Benzoate degradation (path:ec00362); Polycyclic aromatic hydrocarbon degradation (path:ec00624); Microbial metabolism in diverse environments (path:ec01120)	0	0	0	0	1	0	0	0	0	0
A0A4Q7AGH2	Acinetobacter wuhouensis	gammaproteobacteria	Pseudomonadales	Moraxellaceae	Protocatechuate 3,4-dioxygenase subunit beta {ECO:0000313|EMBL:RZG44709.1}	GO:0008199|GO:0018578|GO:0019619	M:ferric iron binding|M:protocatechuate 3,4-dioxygenase activity|B:3,4-dihydroxybenzoate catabolic process	1.13.11.3	Protocatechuate 3,4-dioxygenase	Benzoate degradation (path:ec00362); Polycyclic aromatic hydrocarbon degradation (path:ec00624); Microbial metabolism in diverse environments (path:ec01120)	0	0	0	0	10	0	0	0	0	0
D0S8E8	Acinetobacter johnsonii SH046	Gammaproteobacteria	Pseudomonadales	Moraxellaceae	Protocatechuate 3,4-dioxygenase, alpha subunit {ECO:0000313|EMBL:EEY97670.1}	GO:0008199|GO:0018578|GO:0019439	M:ferric iron binding|M:protocatechuate 3,4-dioxygenase activity|B:aromatic compound catabolic process	1.13.11.3	Protocatechuate 3,4-dioxygenase	Benzoate degradation (path:ec00362); Polycyclic aromatic hydrocarbon degradation (path:ec00624); Microbial metabolism in diverse environments (path:ec01120)	0	0	0	0	13	0	0	0	0	0
A0A3N6X5L9	Aeromicrobium camelliae	Actinobacteria	Propionibacteriales	Nocardioidaceae	Protocatechuate 3,4-dioxygenase subunit alpha {ECO:0000313|EMBL:RQN08968.1}	GO:0008199|GO:0018578|GO:0019439	M:ferric iron binding|M:protocatechuate 3,4-dioxygenase activity|B:aromatic compound catabolic process	1.13.11.3	Protocatechuate 3,4-dioxygenase	Benzoate degradation (path:ec00362); Polycyclic aromatic hydrocarbon degradation (path:ec00624); Microbial metabolism in diverse environments (path:ec01120)	0	0	0	0	2	0	0	0	0	0
G8PXF3	seudomonas fluorescens (strain F113)	Gammaproteobacteria	Pseudomonadales	Pseudomonadaceae	PcaR {ECO:0000313|EMBL:AEV61363.1}	GO:0003677|GO:0018578|GO:0046278|GO:0045893	M:DNA binding|M:protocatechuate 3,4-dioxygenase activity|B:3,4-dihydroxybenzoate metabolic process|B:positive regulation of transcription, DNA-templated	1.13.11.3	Protocatechuate 3,4-dioxygenase	Benzoate degradation (path:ec00362); Polycyclic aromatic hydrocarbon degradation (path:ec00624); Microbial metabolism in diverse environments (path:ec01120)	0	0	0	0	76	0	0	0	0	0
C3KAN6	Pseudomonas fluorescens (strain SBW25)	Gammaproteobacteria	Pseudomonadales	Pseudomonadaceae	Protocatechuate 3,4-dioxygenase alpha chain {ECO:0000313|EMBL:CAY47621.1}	GO:0008199|GO:0018578|GO:0019439	M:ferric iron binding|M:protocatechuate 3,4-dioxygenase activity|B:aromatic compound catabolic process	1.13.11.3	Protocatechuate 3,4-dioxygenase	Benzoate degradation (path:ec00362); Polycyclic aromatic hydrocarbon degradation (path:ec00624); Microbial metabolism in diverse environments (path:ec01120)	0	0	0	0	6	0	0	0	0	0
A0A5E7H044	Pseudomonas fluorescens	Gammaproteobacteria	Pseudomonadales	Pseudomonadaceae	Protocatechuate 3,4-dioxygenase alpha chain {ECO:0000313|EMBL:VVO57265.1}	GO:0008199|GO:0018578|GO:0019439	M:ferric iron binding|M:protocatechuate 3,4-dioxygenase activity|B:aromatic compound catabolic process	1.13.11.3	Protocatechuate 3,4-dioxygenase	Benzoate degradation (path:ec00362); Polycyclic aromatic hydrocarbon degradation (path:ec00624); Microbial metabolism in diverse environments (path:ec01120)	0	0	0	0	4	0	0	0	0	0
A0A109LG42	Pseudomonas fluorescens	Gammaproteobacteria	Pseudomonadales	Pseudomonadaceae	Protocatechuate 3,4-dioxygenase beta chain {ECO:0000313|EMBL:KWV87080.1}	GO:0008199|GO:0018578|GO:0006725	M:ferric iron binding|M:protocatechuate 3,4-dioxygenase activity|B:cellular aromatic compound metabolic process	1.13.11.3	Protocatechuate 3,4-dioxygenase	Benzoate degradation (path:ec00362); Polycyclic aromatic hydrocarbon degradation (path:ec00624); Microbial metabolism in diverse environments (path:ec01120)	0	0	0	0	32	0	0	0	0	0
A0A5E7BDU8	Pseudomonas fluorescens	Gammaproteobacteria	Pseudomonadales	Pseudomonadaceae	Protocatechuate 3,4-dioxygenase beta chain {ECO:0000313|EMBL:VVN90228.1}	GO:0008199|GO:0018578|GO:0019619	M:ferric iron binding|M:protocatechuate 3,4-dioxygenase activity|B:3,4-dihydroxybenzoate catabolic process	1.13.11.3	Protocatechuate 3,4-dioxygenase	Benzoate degradation (path:ec00362); Polycyclic aromatic hydrocarbon degradation (path:ec00624); Microbial metabolism in diverse environments (path:ec01120)	0	0	0	0	30	0	0	0	0	0
A0A5E7R7S8	Pseudomonas fluorescens	Gammaproteobacteria	Pseudomonadales	Pseudomonadaceae	Protocatechuate 3,4-dioxygenase beta chain {ECO:0000313|EMBL:VVP69500.1}	GO:0008199|GO:0018578|GO:0019619	M:ferric iron binding|M:protocatechuate 3,4-dioxygenase activity|B:3,4-dihydroxybenzoate catabolic process	1.13.11.3	Protocatechuate 3,4-dioxygenase	Benzoate degradation (path:ec00362); Polycyclic aromatic hydrocarbon degradation (path:ec00624); Microbial metabolism in diverse environments (path:ec01120)	0	0	0	0	6	0	0	0	0	0
A0A1B3D6P0	Pseudomonas fluorescens	Gammaproteobacteria	Pseudomonadales	Pseudomonadaceae	Protocatechuate 3,4-dioxygenase subunit alpha {ECO:0000313|EMBL:AOE67140.1}	GO:0008199|GO:0018578|GO:0019439	M:ferric iron binding|M:protocatechuate 3,4-dioxygenase activity|B:aromatic compound catabolic process	1.13.11.3	Protocatechuate 3,4-dioxygenase	Benzoate degradation (path:ec00362); Polycyclic aromatic hydrocarbon degradation (path:ec00624); Microbial metabolism in diverse environments (path:ec01120)	0	0	0	0	3	0	0	0	0	0
A0A3S4GRY8	Paracoccus haematequi	Alphaproteobacteria	Rhodobacterales	Rhodobacteraceae	Protocatechuate 3,4-dioxygenase alpha chain {ECO:0000313|EMBL:VDS09463.1}	GO:0008199|GO:0018578|GO:0019439	M:ferric iron binding|M:protocatechuate 3,4-dioxygenase activity|B:aromatic compound catabolic process	1.13.11.3	Protocatechuate 3,4-dioxygenase	Benzoate degradation (path:ec00362); Polycyclic aromatic hydrocarbon degradation (path:ec00624); Microbial metabolism in diverse environments (path:ec01120)	0	0	0	0	0	0	0	2	0	0
A0A5P2R215	Paracoccus yeei	Alphaproteobacteria	Rhodobacterales	Rhodobacteraceae	Protocatechuate 3,4-dioxygenase subunit alpha {ECO:0000313|EMBL:QEU10782.1}	GO:0008199|GO:0018578|GO:0019439	M:ferric iron binding|M:protocatechuate 3,4-dioxygenase activity|B:aromatic compound catabolic process	1.13.11.3	Protocatechuate 3,4-dioxygenase	Benzoate degradation (path:ec00362); Polycyclic aromatic hydrocarbon degradation (path:ec00624); Microbial metabolism in diverse environments (path:ec01120)	60	16	0	0	0	0	0	0	0	0
A0A3N7GCR9	Paracoccus sp. BP8	Alphaproteobacteria	Rhodobacterales	Rhodobacteraceae	Protocatechuate 3,4-dioxygenase subunit beta {ECO:0000313|EMBL:RQP05334.1}	GO:0008199|GO:0018578|GO:0019619	M:ferric iron binding|M:protocatechuate 3,4-dioxygenase activity|B:3,4-dihydroxybenzoate catabolic process	1.13.11.3	Protocatechuate 3,4-dioxygenase	Benzoate degradation (path:ec00362); Polycyclic aromatic hydrocarbon degradation (path:ec00624); Microbial metabolism in diverse environments (path:ec01120)	49	13	0	0	0	0	0	0	0	0
A0A7W6LTP8	Sphingobium scionense	Alphaproteobacteria	Sphingomonadales	Sphingomonadaceae	4,5-dihydroxyphthalate decarboxylase {ECO:0000313|EMBL:MBB4150305.1}	None	None	4.1.1.55	4,5-dihydroxyphthalate decarboxylase	Polycyclic aromatic hydrocarbon degradation (path:ec00624); Microbial metabolism in diverse environments (path:ec01120)	9	9	0	0	16	0	4	0	8	0
A0A7W7K1Y0	Sphingomonas kyeonggiensis	Alphaproteobacteria	Sphingomonadales	Sphingomonadaceae	4,5-dihydroxyphthalate decarboxylase {ECO:0000313|EMBL:MBB4839211.1}	None	None	4.1.1.55	4,5-dihydroxyphthalate decarboxylase	Polycyclic aromatic hydrocarbon degradation (path:ec00624); Microbial metabolism in diverse environments (path:ec01120)	0	8	19	8	0	0	0	0	0	0
A0A7W9AL92	Sphingobium boeckii	Alphaproteobacteria	Sphingomonadales	Sphingomonadaceae	4,5-dihydroxyphthalate decarboxylase {ECO:0000313|EMBL:MBB5687743.1}	None	None	4.1.1.55	4,5-dihydroxyphthalate decarboxylase	Polycyclic aromatic hydrocarbon degradation (path:ec00624); Microbial metabolism in diverse environments (path:ec01120)	0	0	0	12	0	0	0	0	0	0
A0A5E7Y891	Sphingomonas aurantiaca	Alphaproteobacteria	Sphingomonadales	Sphingomonadaceae	Protocatechuate 3,4-dioxygenase alpha chain {ECO:0000313|EMBL:VVT03124.1}	GO:0008199|GO:0018578|GO:0019439	M:ferric iron binding|M:protocatechuate 3,4-dioxygenase activity|B:aromatic compound catabolic process	1.13.11.3	Protocatechuate 3,4-dioxygenase	Benzoate degradation (path:ec00362); Polycyclic aromatic hydrocarbon degradation (path:ec00624); Microbial metabolism in diverse environments (path:ec01120)	0	0	0	12	0	0	0	0	9	0
A0A7W9BUI8	Pseudomonas fluorescens	Alphaproteobacteria	Sphingomonadales	Sphingomonadaceae	Protocatechuate 3,4-dioxygenase beta subunit {ECO:0000313|EMBL:MBB5730271.1}	None	None	1.13.11.3	Protocatechuate 3,4-dioxygenase	Benzoate degradation (path:ec00362); Polycyclic aromatic hydrocarbon degradation (path:ec00624); Microbial metabolism in diverse environments (path:ec01120)	13	0	9	14	11	0	0	0	4	0
A0A520JS67	Sphingomonas sp.	Alphaproteobacteria	Sphingomonadales	Sphingomonadaceae	Protocatechuate 3,4-dioxygenase subunit alpha {ECO:0000313|EMBL:RZM37663.1}	GO:0008199|GO:0018578|GO:0019439	M:ferric iron binding|M:protocatechuate 3,4-dioxygenase activity|B:aromatic compound catabolic process	1.13.11.3	Protocatechuate 3,4-dioxygenase	Benzoate degradation (path:ec00362); Polycyclic aromatic hydrocarbon degradation (path:ec00624); Microbial metabolism in diverse environments (path:ec01120)	6	0	0	0	15	0	0	0	0	0
A0A520EZ25	Sphingomonas sp.	Alphaproteobacteria	Sphingomonadales	Sphingomonadaceae	Protocatechuate 3,4-dioxygenase subunit beta {ECO:0000313|EMBL:RZL74990.1}	GO:0008199|GO:0018578|GO:0019619	M:ferric iron binding|M:protocatechuate 3,4-dioxygenase activity|B:3,4-dihydroxybenzoate catabolic process	1.13.11.3	Protocatechuate 3,4-dioxygenase	Benzoate degradation (path:ec00362); Polycyclic aromatic hydrocarbon degradation (path:ec00624); Microbial metabolism in diverse environments (path:ec01120)	15	17	0	25	28	0	0	0	14	0
A0A031HKY0	Sphingomonas sp. RIT328	Alphaproteobacteria	Sphingomonadales	Sphingomonadaceae	Protocatechuate 3,4-dioxygenase, alpha subunit {ECO:0000313|EMBL:EZP48730.1}	GO:0008199|GO:0018578|GO:0019439	M:ferric iron binding|M:protocatechuate 3,4-dioxygenase activity|B:aromatic compound catabolic process	1.13.11.3	Protocatechuate 3,4-dioxygenase	Benzoate degradation (path:ec00362); Polycyclic aromatic hydrocarbon degradation (path:ec00624); Microbial metabolism in diverse environments (path:ec01120)	0	0	0	0	20	0	0	0	0	4
A0A031HIW4	Sphingomonas sp. RIT328	Alphaproteobacteria	Sphingomonadales	Sphingomonadaceae	Protocatechuate 3,4-dioxygenase, beta subunit {ECO:0000313|EMBL:EZP48731.1}	GO:0008199|GO:0018578|GO:0019619	M:ferric iron binding|M:protocatechuate 3,4-dioxygenase activity|B:3,4-dihydroxybenzoate catabolic process	1.13.11.3	Protocatechuate 3,4-dioxygenase	Benzoate degradation (path:ec00362); Polycyclic aromatic hydrocarbon degradation (path:ec00624); Microbial metabolism in diverse environments (path:ec01120)	46	45	46	72	79	5	7	0	12	13
G2IJI4	Sphingobium sp. (strain NBRC 103272 / SYK-6)	Alphaproteobacteria	Sphingomonadales	Sphingomonadaceae	Protocatechuate 4,5-dioxygenase alpha chain {ECO:0000313|EMBL:BAK64854.1}	GO:0018579	M:protocatechuate 4,5-dioxygenase activity	1.13.11.8	Protocatechuate 4,5-dioxygenase	Benzoate degradation (path:ec00362); Polycyclic aromatic hydrocarbon degradation (path:ec00624); Aminobenzoate degradation (path:ec00627); Microbial metabolism in diverse environments (path:ec01120)	2	4	0	0	4	0	0	0	0	0
A0A7V9YMG4	Sphingobium sp. B10D3C	Alphaproteobacteria	Sphingomonadales	Sphingomonadaceae	Protocatechuate 4,5-dioxygenase alpha chain {ECO:0000313|EMBL:MBA2855465.1}	None	None	1.13.11.8	Protocatechuate 4,5-dioxygenase	Benzoate degradation (path:ec00362); Polycyclic aromatic hydrocarbon degradation (path:ec00624); Aminobenzoate degradation (path:ec00627); Microbial metabolism in diverse environments (path:ec01120)	0	4	0	0	0	0	0	0	0	0
G2IJI5	Sphingobium sp. (strain NBRC 103272 / SYK-6)	Alphaproteobacteria	Sphingomonadales	Sphingomonadaceae	Protocatechuate 4,5-dioxygenase beta chain {ECO:0000313|EMBL:BAK64855.1}	GO:0008198|GO:0018579|GO:0006725	M:ferrous iron binding|M:protocatechuate 4,5-dioxygenase activity|B:cellular aromatic compound metabolic process	1.13.11.8	Protocatechuate 4,5-dioxygenase	Benzoate degradation (path:ec00362); Polycyclic aromatic hydrocarbon degradation (path:ec00624); Aminobenzoate degradation (path:ec00627); Microbial metabolism in diverse environments (path:ec01120)	0	0	0	8	10	0	4	0	0	0
A0A518RE08	Sphingomonas sp. XS-10	Alphaproteobacteria	Sphingomonadales	Sphingomonadaceae	Protocatechuate 4,5-dioxygenase subunit alpha {ECO:0000313|EMBL:QDX25641.1}	GO:0018579	M:protocatechuate 4,5-dioxygenase activity	1.13.11.8	Protocatechuate 4,5-dioxygenase	Benzoate degradation (path:ec00362); Polycyclic aromatic hydrocarbon degradation (path:ec00624); Aminobenzoate degradation (path:ec00627); Microbial metabolism in diverse environments (path:ec01120)	0	0	0	0	3	0	0	0	0	0
A0A7G5Z0F2	Sphingomonas alpina	Alphaproteobacteria	Sphingomonadales	Sphingomonadaceae	Protocatechuate 4,5-dioxygenase subunit alpha {ECO:0000313|EMBL:QNA84180.1}	GO:0018579	M:protocatechuate 4,5-dioxygenase activity	1.13.11.8	Protocatechuate 4,5-dioxygenase	Benzoate degradation (path:ec00362); Polycyclic aromatic hydrocarbon degradation (path:ec00624); Aminobenzoate degradation (path:ec00627); Microbial metabolism in diverse environments (path:ec01120)	0	2	0	0	6	0	0	0	0	0
A0A396RRU0	Sphingomonas gilva	Alphaproteobacteria	Sphingomonadales	Sphingomonadaceae	Protocatechuate 4,5-dioxygenase subunit alpha {ECO:0000313|EMBL:RHW19230.1}	GO:0018579	M:protocatechuate 4,5-dioxygenase activity	1.13.11.8	Protocatechuate 4,5-dioxygenase	Benzoate degradation (path:ec00362); Polycyclic aromatic hydrocarbon degradation (path:ec00624); Aminobenzoate degradation (path:ec00627); Microbial metabolism in diverse environments (path:ec01120)	0	0	0	0	3	0	0	0	0	0
A0A519QM92	Novosphingobium sp.	Alphaproteobacteria	Sphingomonadales	Sphingomonadaceae	Protocatechuate 4,5-dioxygenase subunit alpha {ECO:0000313|EMBL:RZJ99440.1}	GO:0018579	M:protocatechuate 4,5-dioxygenase activity	1.13.11.8	Protocatechuate 4,5-dioxygenase	Benzoate degradation (path:ec00362); Polycyclic aromatic hydrocarbon degradation (path:ec00624); Aminobenzoate degradation (path:ec00627); Microbial metabolism in diverse environments (path:ec01120)	0	0	0	0	4	0	0	0	0	0
A0A520IWG1	Sphingomonas sp.	Alphaproteobacteria	Sphingomonadales	Sphingomonadaceae	Protocatechuate 4,5-dioxygenase subunit alpha {ECO:0000313|EMBL:RZM26837.1}	GO:0018579	M:protocatechuate 4,5-dioxygenase activity	1.13.11.8	Protocatechuate 4,5-dioxygenase	Benzoate degradation (path:ec00362); Polycyclic aromatic hydrocarbon degradation (path:ec00624); Aminobenzoate degradation (path:ec00627); Microbial metabolism in diverse environments (path:ec01120)	3	3	3	7	2	0	0	0	10	2
A0A158RZC8	Novosphingobium sp. KN65.2	Alphaproteobacteria	Sphingomonadales	Sphingomonadaceae	Protocatechuate 4,5-dioxygenase, alpha chain {ECO:0000313|EMBL:CDO35505.1}	GO:0018579	M:protocatechuate 4,5-dioxygenase activity	1.13.11.8	Protocatechuate 4,5-dioxygenase	Benzoate degradation (path:ec00362); Polycyclic aromatic hydrocarbon degradation (path:ec00624); Aminobenzoate degradation (path:ec00627); Microbial metabolism in diverse environments (path:ec01120)	0	0	0	0	2	0	0	0	0	0
A0A4P6G0A3	Sphingosinicella sp. BN140058	Alphaproteobacteria	Sphingomonadales	Sphingosinicellaceae	Protocatechuate 4,5-dioxygenase subunit alpha {ECO:0000313|EMBL:QAY76428.1}	GO:0018579	M:protocatechuate 4,5-dioxygenase activity	1.13.11.8	Protocatechuate 4,5-dioxygenase	Benzoate degradation (path:ec00362); Polycyclic aromatic hydrocarbon degradation (path:ec00624); Aminobenzoate degradation (path:ec00627); Microbial metabolism in diverse environments (path:ec01120)	0	0	0	0	3	0	0	0	7	0
A0A1W5DKE7	Serratia proteamaculans	Gammaproteobacteria	Enterobacterales	Yersiniaceae	Protocatechuate 3,4-dioxygenase alpha chain (3,4-PCD) {ECO:0000313|EMBL:SMB36010.1}	GO:0008199|GO:0018578|GO:0019439	M:ferric iron binding|M:protocatechuate 3,4-dioxygenase activity|B:aromatic compound catabolic process	1.13.11.3	Protocatechuate 3,4-dioxygenase	Benzoate degradation (path:ec00362); Polycyclic aromatic hydrocarbon degradation (path:ec00624); Microbial metabolism in diverse environments (path:ec01120)	0	0	0	0	0	0	0	0	23	0
A0A240C3R9	Serratia ficaria	Gammaproteobacteria	Enterobacterales	Yersiniaceae	Protocatechuate 3,4-dioxygenase alpha chain {ECO:0000313|EMBL:SNW01748.1}	GO:0008199|GO:0018578|GO:0006725	M:ferric iron binding|M:protocatechuate 3,4-dioxygenase activity|B:cellular aromatic compound metabolic process	1.13.11.3	Protocatechuate 3,4-dioxygenase	Benzoate degradation (path:ec00362); Polycyclic aromatic hydrocarbon degradation (path:ec00624); Microbial metabolism in diverse environments (path:ec01120)	0	0	0	0	0	0	0	0	6	0
A0A240C1H0	Serratia ficaria	Gammaproteobacteria	Enterobacterales	Yersiniaceae	Protocatechuate 3,4-dioxygenase beta chain {ECO:0000313|EMBL:SNW01745.1}	GO:0008199|GO:0018578|GO:0019619	M:ferric iron binding|M:protocatechuate 3,4-dioxygenase activity|B:3,4-dihydroxybenzoate catabolic process	1.13.11.3	Protocatechuate 3,4-dioxygenase	Benzoate degradation (path:ec00362); Polycyclic aromatic hydrocarbon degradation (path:ec00624); Microbial metabolism in diverse environments (path:ec01120)	0	0	0	0	0	0	0	0	41	0
